# Supplementary material for: Photoinduced bending behavior of crosslinked liquid-crystalline polymer films with a long spacer
Source: Royal Society of Chemistry journal article supplement (doi:10.1039/c0jm00510j), 2010-01-01
Supplement: c0jm00510j.pdf [file c0jm00510j.pdf]

Supplementary information for

## Photoinduced bending behavior of crosslinked liquid-crystalline polymer films with a long spacer

Yuanyuan Zhang, Jixiang Xu, Futao Cheng, Ruoyuan Yin, Chu-Chun Yen and Yanlei Yu\*

*Department of Materials Science, Fudan University, 220 Handan Road, Shanghai 200433, China.*

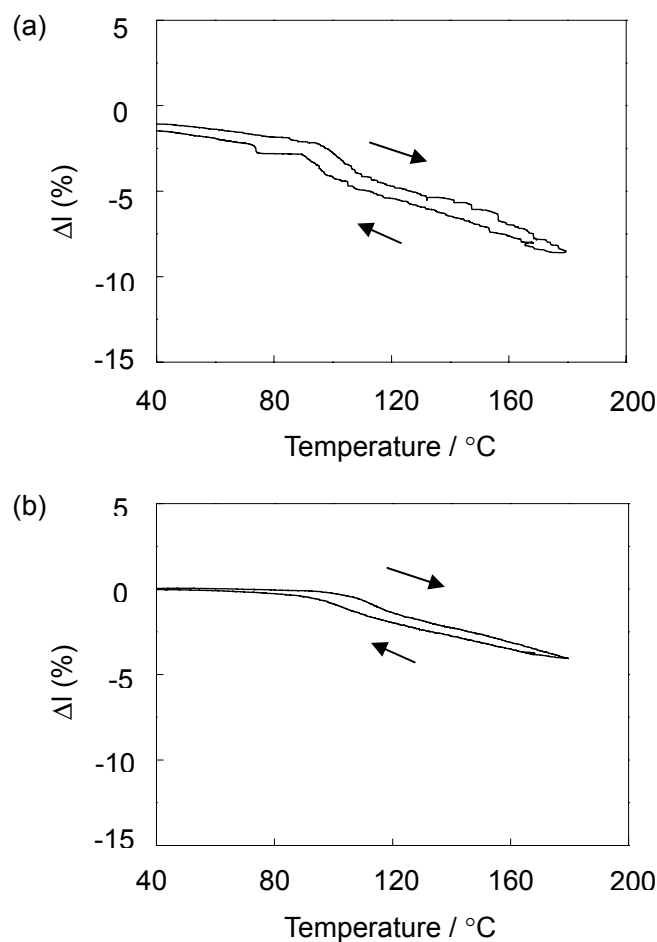

**Figure S1.** Thermal contraction and expansion along the alignment direction of **F6040** (a) and **F2080** (b).

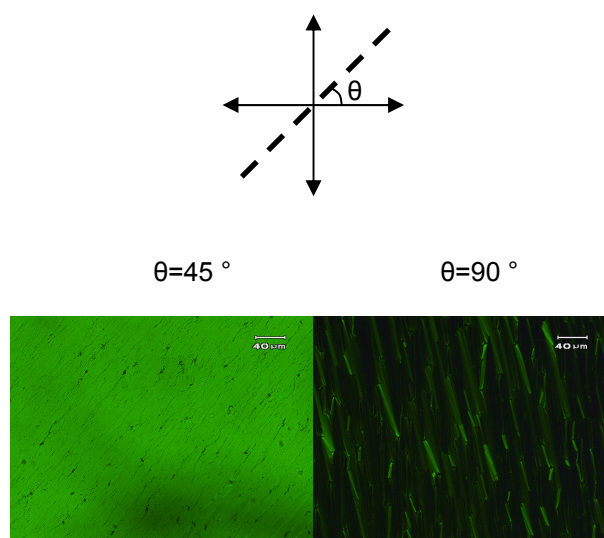

**Figure S2.** Polarizing optical micrographs of **F9010**. The black arrows indicate the direction of optical axes of the polarizers, while the dash line shows the rubbing direction of the alignment layers. Thickness of the film was 2  $\mu\text{m}$ .

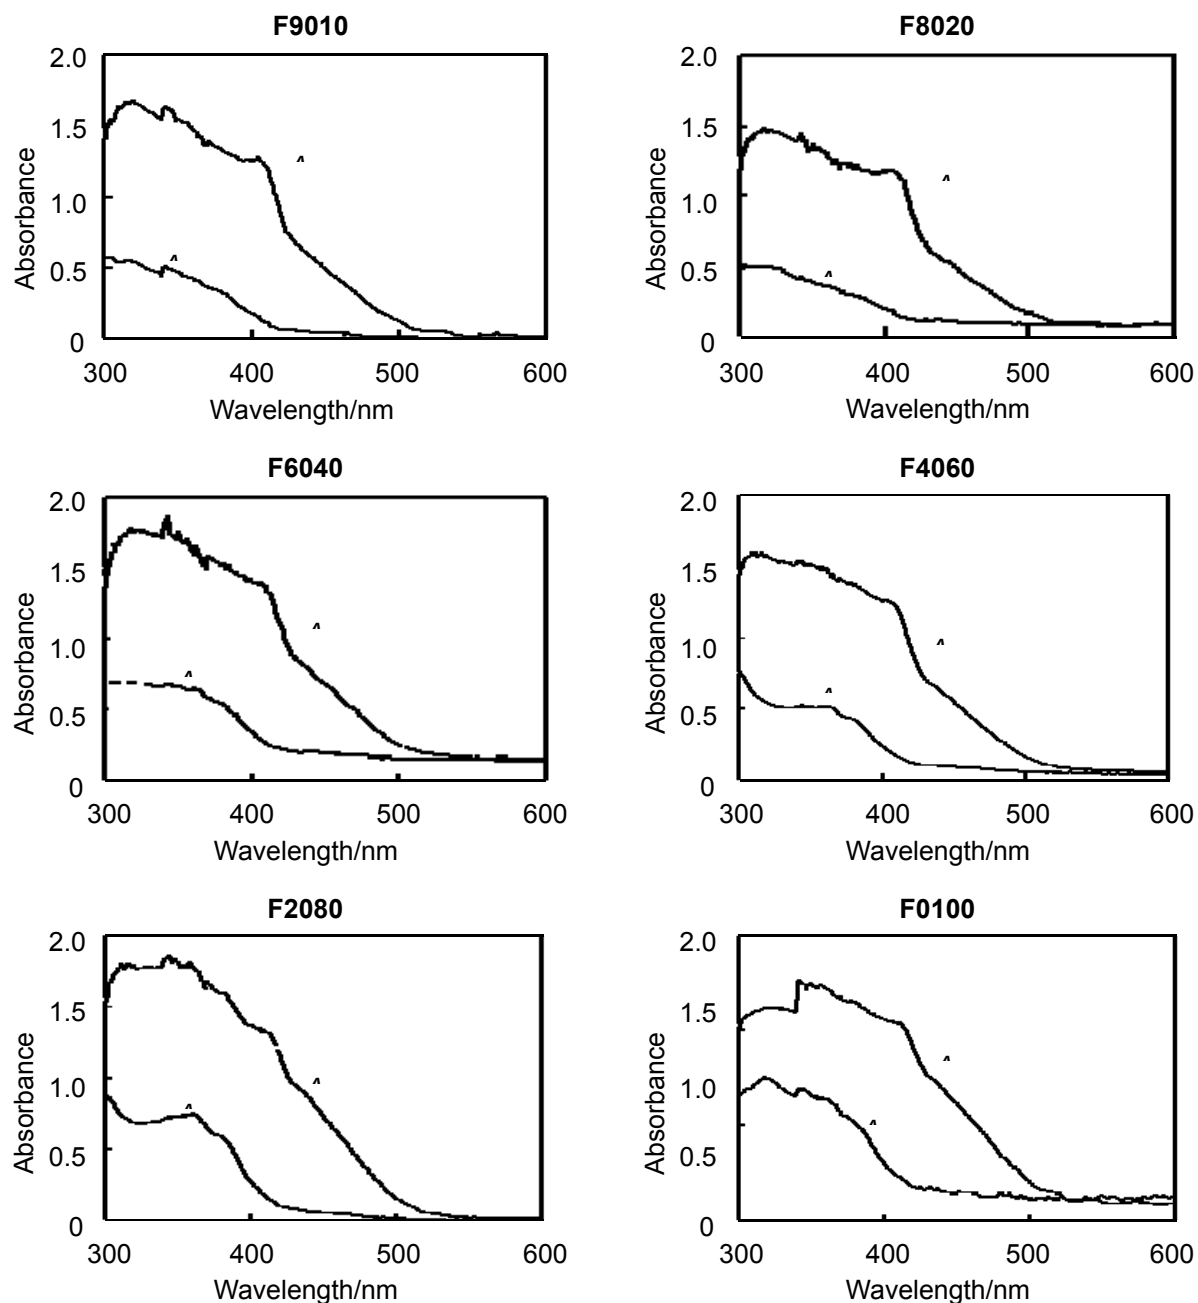

**Figure S3.** Polarized absorbance spectra of different CLCP films.  $A_{\parallel}$  and  $A_{\perp}$  are the absorbance measured with light polarized parallel and perpendicular to the rubbing direction of the alignment layers, respectively.

Thickness of the films was 2  $\mu\text{m}$ .

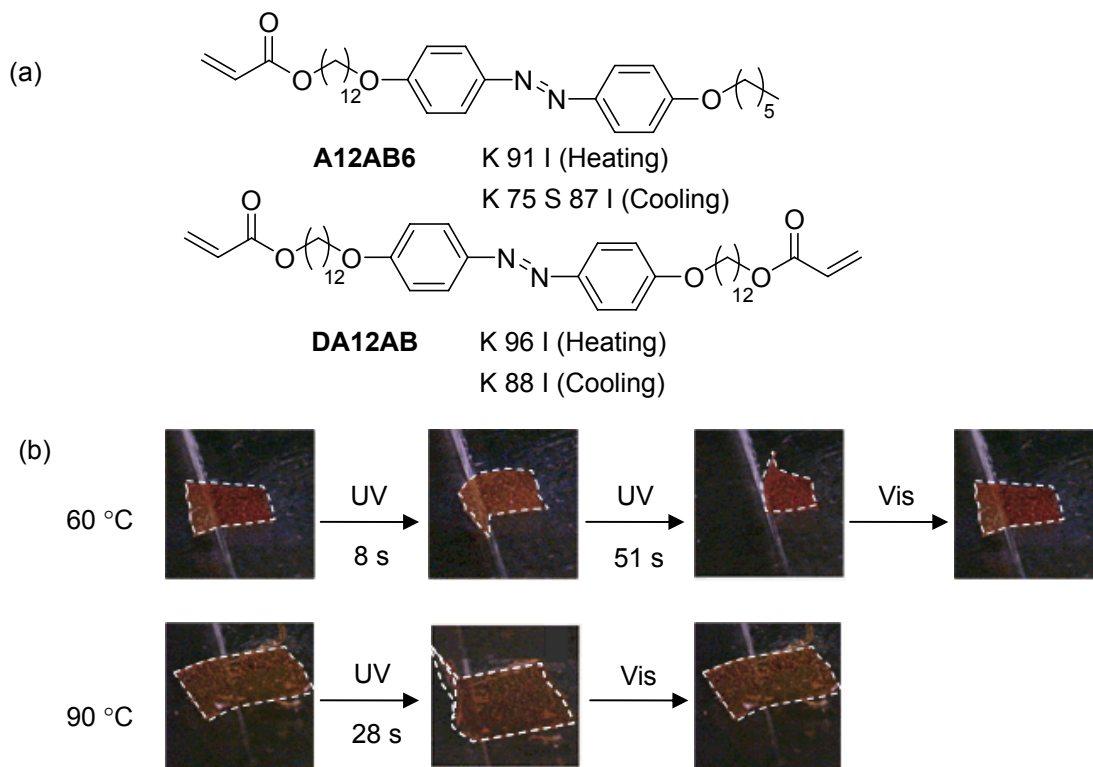

**Figure S4.** Chemical structures and properties of the monomer and the crosslinker used to prepare the CLCP films with a long spacer of dodecylene (a) and photographs of bending and unbending behavior of the CLCP film with 10 % crosslinking density at different temperatures upon the irradiation of UV light (366 nm, 35 mW cm<sup>-2</sup>) and visible light (> 540 nm) (b). Size of the film: 5 mm × 5 mm × 20 μm.
